# Supplementary material for: α1-Microglobulin (A1M) Protects Human Proximal Tubule Epithelial Cells from Heme-Induced Damage In Vitro
Source: MDPI journal article supplement (doi:10.3390/ijms21165825), 2020-08-13
Supplement: s1 [file s1]

Supplementary Material

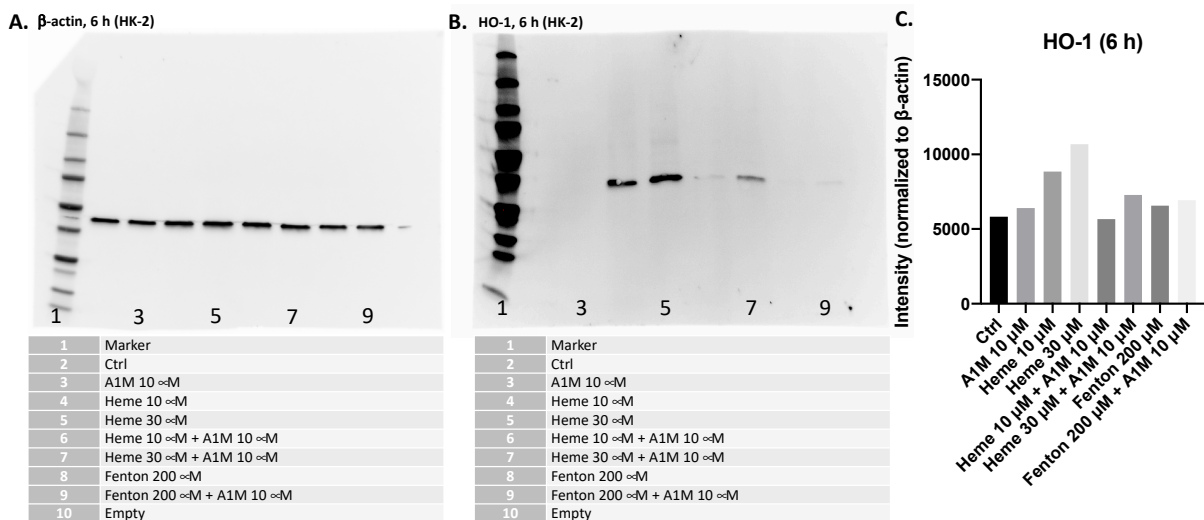

*Supplementary figure S1.* Uncropped western blots from figure 2 with  $\beta$ -actin (A) and HO-1 (B) after 6 h. The bar graph represents densitometric calculations of HO-1 normalized to  $\beta$ -actin (C) presented as intensity.

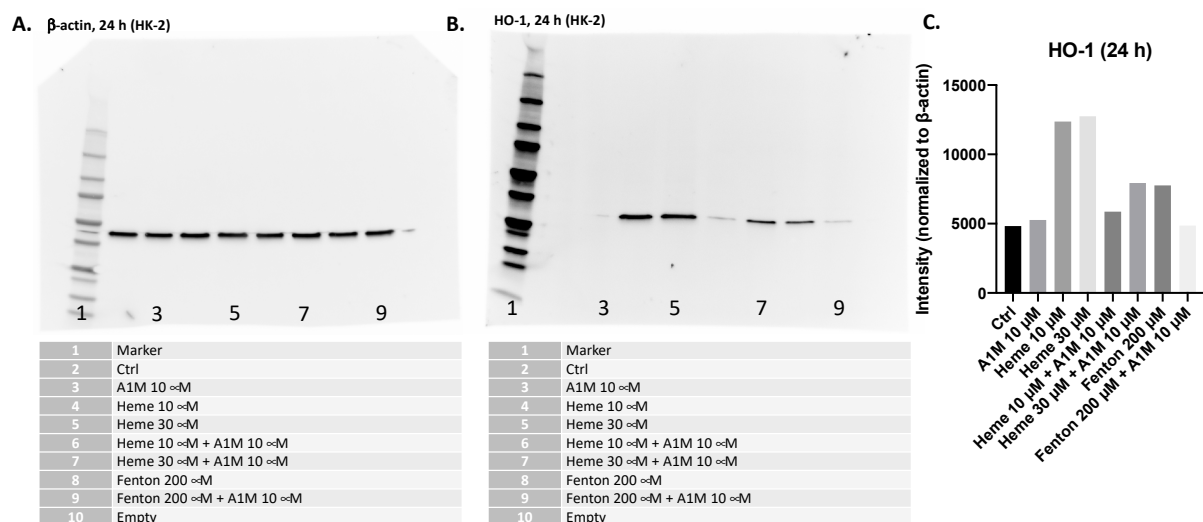

**Supplementary figure S2.** Uncropped western blots from figure 2 with  $\beta$ -actin (A) and HO-1 (B) after 24 h. The bar graph represents densitometric calculations of HO-1 normalized to  $\beta$ -actin (C) presented as intensity.

**A.**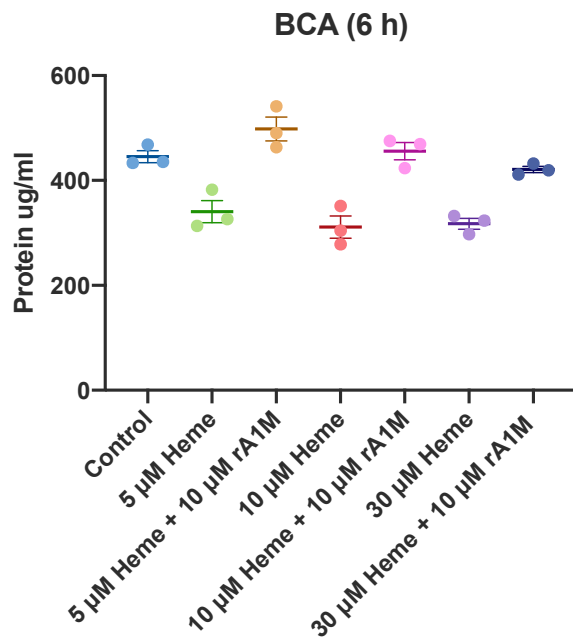**B.**

| Sample                | $\mu$ g/ml |
|-----------------------|------------|
| Control               | 445        |
| Heme 5 $\mu$ M        | 340        |
| Heme 10 $\mu$ M       | 311        |
| Heme 30 $\mu$ M       | 317        |
| Heme 5 $\mu$ M + A1M  | 498        |
| Heme 10 $\mu$ M + A1M | 455        |
| Heme 30 $\mu$ M + A1M | 420        |
| A1M                   | 569        |

*Supplementary figure S3.* BCA results used for Seahorse normalization. BCA was measured after incubation with heme with or without A1M (**A**) and the calculated mean (**B**) was used to correct OCR after treatment and incubation (n = 3).

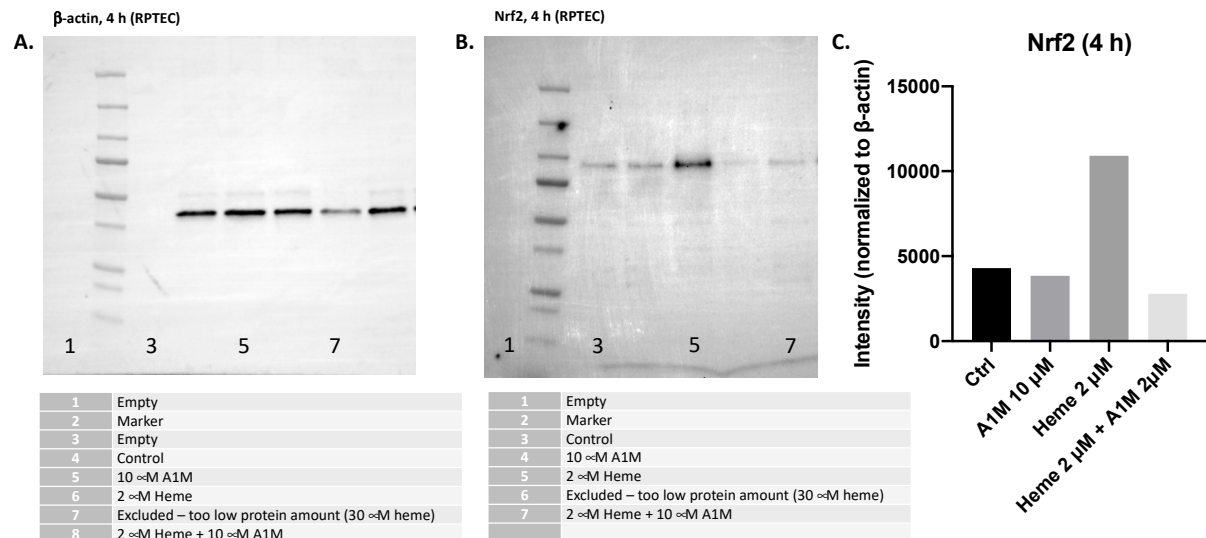

**Supplementary figure S4.** Uncropped western blots from figure 4 with  $\beta$ -actin (A) and Nrf2 (B) after 4 h. The bar graph represents densitometric calculations of Nrf2 normalized to  $\beta$ -actin (C) presented as intensity with control set to 1.

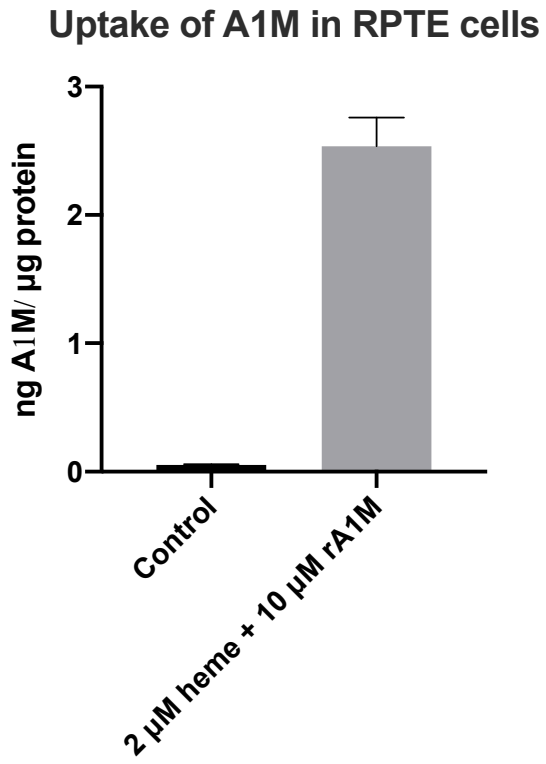

*Supplementary figure S5.* Uptake of A1M in RPTE cells analyzed with radioimmunoassay. Cells were incubated 2 h with 2 µM heme and 10 µM rA1M. Results are adjusted for BCA content and presented as mean ( $\pm$  SEM).
